# Supplementary material for: Leveraging the Cu2SnTe3 additive for an improved thermoelectric figure of merit and module efficiency in Bi0.5Sb1.5Te3-based composites
Source: Royal Society of Chemistry journal article supplement (doi:10.1039/d4ta00552j), 2024-01-01
Supplement: d4ta00552j1.pdf [file d4ta00552j1.pdf]

**Supporting Information:**

**Leveraging Cu<sub>2</sub>SnTe<sub>3</sub> Additives for Improved Thermoelectric Figure of Merit and Module Efficiency in Bi<sub>0.5</sub>Sb<sub>1.5</sub>Te<sub>3</sub>-Based Composites**

Qiaoyan Pan,<sup>†</sup> Kaikai Pang,<sup>†</sup> Qiang Zhang,\* Yan Liu, Huilie Shi, Jingsong Li, Wenjie Zhou, Qianqian Sun, Yuyou Zhang, Xiaojian Tan, Peng Sun, Jiehua Wu,\* Guo-Qiang Liu, Jun Jiang\*

Q. Pan, K. Pang, Dr. Q. Zhang, W. Zhou, Q. Sun, Y. Zhang, Prof. X. Tan, P. Sun, J. Wu, Prof. G.-Q. Liu, Prof. J. Jiang

Ningbo Institute of Materials Technology and Engineering, Chinese Academy of Sciences

Ningbo 315201, China

E-mail: qiangzhang@nimte.ac.cn, jiehuawu@nimte.ac.cn, jjun@nimte.ac.cn

Q. Pan, Dr. Q. Zhang, Q. Sun, Prof. X. Tan, P. Sun, J. Wu, Prof. G.-Q. Liu, Prof. J. Jiang

University of Chinese Academy of Sciences

Beijing 100049, China

Y. Liu, H. Shi, J. Li

Research Institute of Nuclear Power Operation

Wuhan 430223, China

<sup>†</sup> These authors contribute equally.

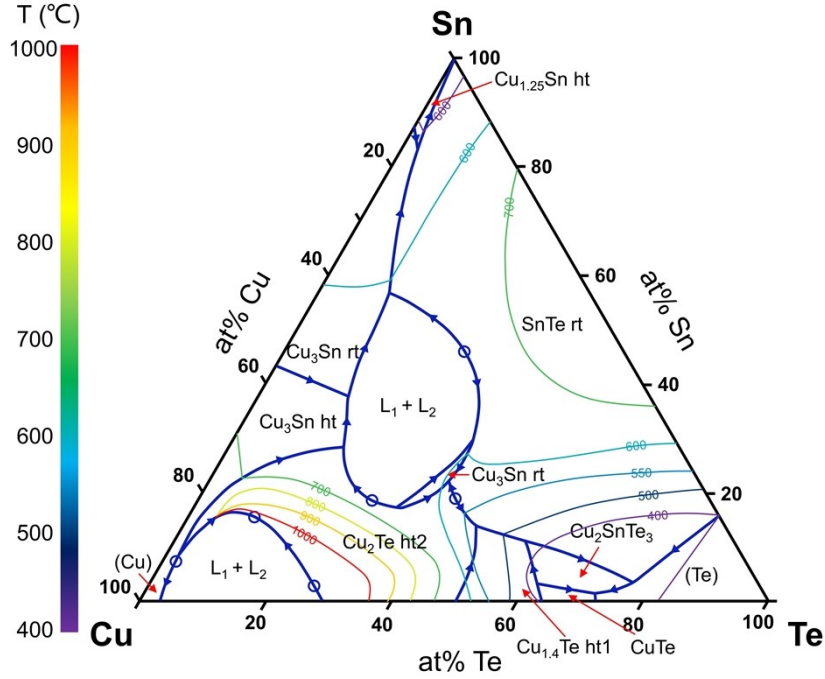

**Figure S1.** The liquidus projection of the ternary phase diagram for the Cu-Sn-Te system.<sup>[1]</sup>

**Table S1.** The XRD refinement results for lattice parameters of  $\text{Bi}_{0.5}\text{Sb}_{1.5}\text{Te}_3$  and  $\text{Bi}_{0.5}\text{Sb}_{1.5}\text{Te}_3 + 0.08 \text{ wt } \% \text{ Cu}_2\text{SnTe}_3$  representative samples.

| Samples                             |       | $x = 0$ | $x = 0.08$ |
|-------------------------------------|-------|---------|------------|
| Lattice parameters ( $\text{\AA}$ ) | $a/b$ | 4.2967  | 4.2949     |
|                                     | $c$   | 30.4862 | 30.4914    |

At the molten temperature of  $\text{Bi}_{0.5}\text{Sb}_{1.5}\text{Te}_3$ ,  $\text{Cu}_2\text{SnTe}_3$  exhibits instability and undergoes facile decomposition, which may cause Cu (1.17  $\text{\AA}$ ) or Sn (1.40  $\text{\AA}$ ) to replace Sb (1.41  $\text{\AA}$ ) or Bi (1.46  $\text{\AA}$ ), thereby slightly reducing the  $a$ - and  $b$ -axis. On the contrary, the  $c$ -axis slightly increases, possibly due to part of Cu atoms entering the van der Waals interlayer positions. The variation of lattice constants indicates that  $\text{Cu}_2\text{SnTe}_3$  has been successfully doped into  $\text{Bi}_{0.5}\text{Sb}_{1.5}\text{Te}_3$  and formed a stable solid solution. In this work, the variations in the lattice parameters of the samples are inconsequential, given the trace amount of  $\text{Cu}_2\text{SnTe}_3$ .

### The calculation of orientation factor $F$

The orientation factor ( $F$ ), serving as an indicator of the orientation degree in layered-structural samples, is calculated using the Lotgering method and expressed by the following equation:<sup>[2]</sup>

$$F = \frac{P - P_0}{1 - P_0}$$
$$P = \frac{\sum I(00l)}{\sum I(hkl)}$$
$$P_0 = \frac{\sum I_0(00l)}{\sum I_0(hkl)}$$

where  $\sum I(00l)$  represents the total intensity of all  $(00l)$  planes diffraction peaks,  $\sum I(hkl)$  represents the total intensity of all  $(hkl)$  diffraction peaks, and  $P$  is the ratio of  $(00l)$  plane intensity to total intensity in the measured data. Similarly,  $\sum I_0(00l)$ ,  $\sum I_0(hkl)$ , and  $P_0$  represent the corresponding parts of the standard powder diffraction file. In the X-ray patterns of incompletely oriented materials, the  $(hkl)$  reflections still occur, and the ratio of the intensity of the  $(00l)$  and  $(hkl)$  reflections increases with stronger orientation. The orientation factor  $F$  takes values ranging from 0 to 1, indicating from no preferred orientation to complete orientation.

For a series of samples, the calculated orientation factors  $F_{00l}$  are summarized in the following table. It can be seen that the  $F_{00l}$  values of the samples prepared by ball milling and spark plasma sintering methods are very small, ranging from 0.045 to 0.070.

**Table S2.** Orientation factors  $F_{00l}$  for the  $\text{Bi}_{0.5}\text{Sb}_{1.5}\text{Te}_3 + x \text{ wt}\% \text{ Cu}_2\text{SnTe}_3$  samples at room temperature.

| $x$  | $F_{00l}$ |
|------|-----------|
| 0    | 0.05641   |
| 0.04 | 0.06967   |
| 0.06 | 0.06674   |
| 0.08 | 0.05499   |
| 0.10 | 0.04691   |

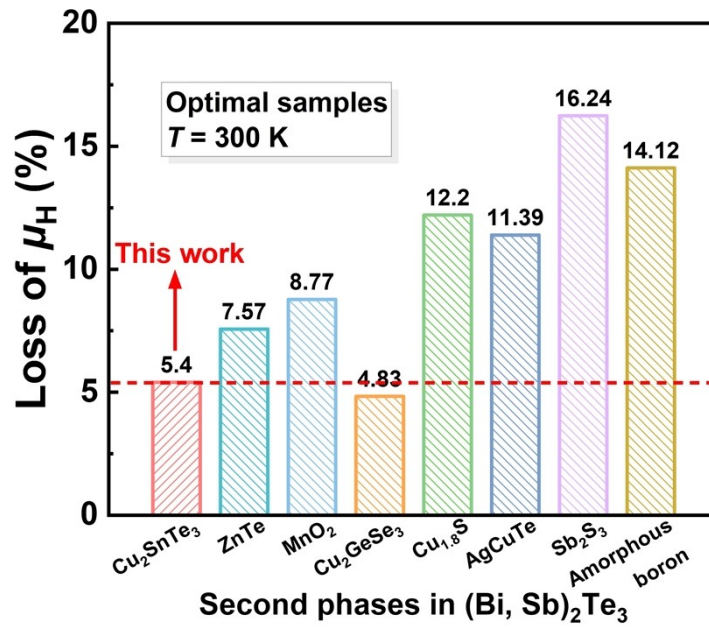

**Figure S2.** Comparison of the mobility loss of optimal samples at 300 K due to the second phases with different types and concentrations.

## Single Parabolic Band (SPB) model

The SPB model, derived from the Boltzmann transport equation, assumes that only one parabolic band contributes to the electron conduction and that acoustic phonon scattering dominates.<sup>[3]</sup> With the SPB model, the bidirectional analysis of electrical transport theory and experimental data can be realized. The main equations are as follows:<sup>[4]</sup>

Fermi integral,

$$F_j(\eta) = \int_0^{\infty} \frac{\xi^j}{1 + e^{\xi - \eta}} d\xi$$

The Seebeck coefficient,

$$S(\eta) = \frac{k_B}{e} \left[ \frac{(r + 5/2)F_{(r+3/2)}(\eta)}{(r + 3/2)F_{(r+1/2)}(\eta)} - \eta \right]$$

The Hall carrier concentration,

$$n_H = \frac{1}{eR_H} = \frac{8\pi(2m_d^*k_B T)^{3/2}(r + 3/2)^2 F_{(r+1/2)}^2(\eta)}{3h^3 (2r + 3/2)F_{(2r+1/2)}(\eta)}$$

The Hall mobility,

$$\mu_H = \left[ \frac{e\pi h^4 C_l}{\sqrt{2}(k_B T)^{3/2} E_{def}^2 (m_d^*)^{5/2}} \right] \frac{(2r + 3/2)F_{(2r+1/2)}(\eta)}{(r + 3/2)^2 F_{(r+1/2)}(\eta)}$$

Lorenz Factor,

$$L = \left( \frac{k_B}{e} \right)^2 \left\{ \frac{(r + 7/2)F_{(r+5/2)}(\eta)}{(r + 3/2)F_{(r+3/2)}(\eta)} - \left[ \frac{(r + 5/2)F_{(r+3/2)}(\eta)}{(r + 3/2)F_{(r+1/2)}(\eta)} \right]^2 \right\}$$

In the above equations,  $m_d^*$  is the density-of-states effective mass,  $C_l$  is the elastic constant for longitudinal vibrations,  $E_{def}$  is the deformation potential coefficient characterizing the strength of carriers scattered by acoustic phonons, and  $\eta$  is the reduced Fermi level. When charge carriers are scattered by acoustic phonons,  $r = -1/2$ .

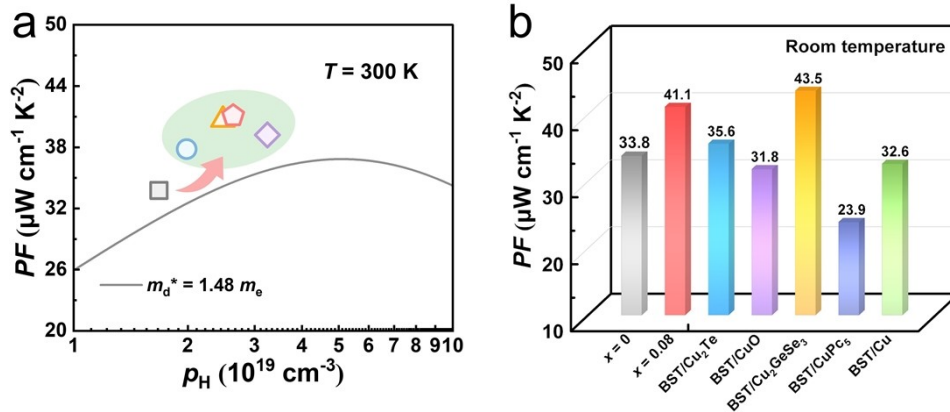

**Figure S3.** (a) Carrier concentration dependence of power factor for a series of samples at 300 K. (b) Comparison of power factors at room temperature of  $x = 0$  and  $x = 0.08$  samples with previously reported  $(\text{Bi, Sb})_2\text{Te}_3$ -based materials.<sup>[5–9]</sup>

### Calculation of $\kappa_{\text{ph}}$ and $\kappa_{\text{bip}}$

Disregarding the bipolar effect at lower temperatures, the value of  $\kappa_{\text{ph}} + \kappa_{\text{bip}}$  is approximately equal to the value of  $\kappa_{\text{ph}}$ . The  $\kappa_{\text{ph}}$  data around 300 K can be fitted with the expression  $\kappa_{\text{ph}} = aT^{-1} + b$ , where  $a$  and  $b$  are the fitting parameters. Then the fitted  $\kappa_{\text{ph}}$  is obtained by extrapolating the equation to 500 K. Finally, the fitted  $\kappa_{\text{ph}}$  and calculated  $\kappa_e$  are subtracted from the measured  $\kappa_{\text{tot}}$  to obtain the  $\kappa_{\text{bip}}$  values for all samples between 300–500 K.

**Table S3.** Fitting parameters for all samples using the expression of  $\kappa_{\text{ph}} = aT^{-1} + b$ .

|     | $\text{Bi}_{0.5}\text{Sb}_{1.5}\text{Te}_3 + x \text{ wt}\% \text{ Cu}_2\text{SnTe}_3$ |            |            |            |            |
|-----|----------------------------------------------------------------------------------------|------------|------------|------------|------------|
|     | $x = 0$                                                                                | $x = 0.04$ | $x = 0.06$ | $x = 0.08$ | $x = 0.10$ |
| $a$ | 10.25821                                                                               | 6.26283    | 7.22138    | 12.37915   | 13.85580   |
| $b$ | 0.60148                                                                                | 0.55284    | 0.51630    | 0.46933    | 0.44540    |

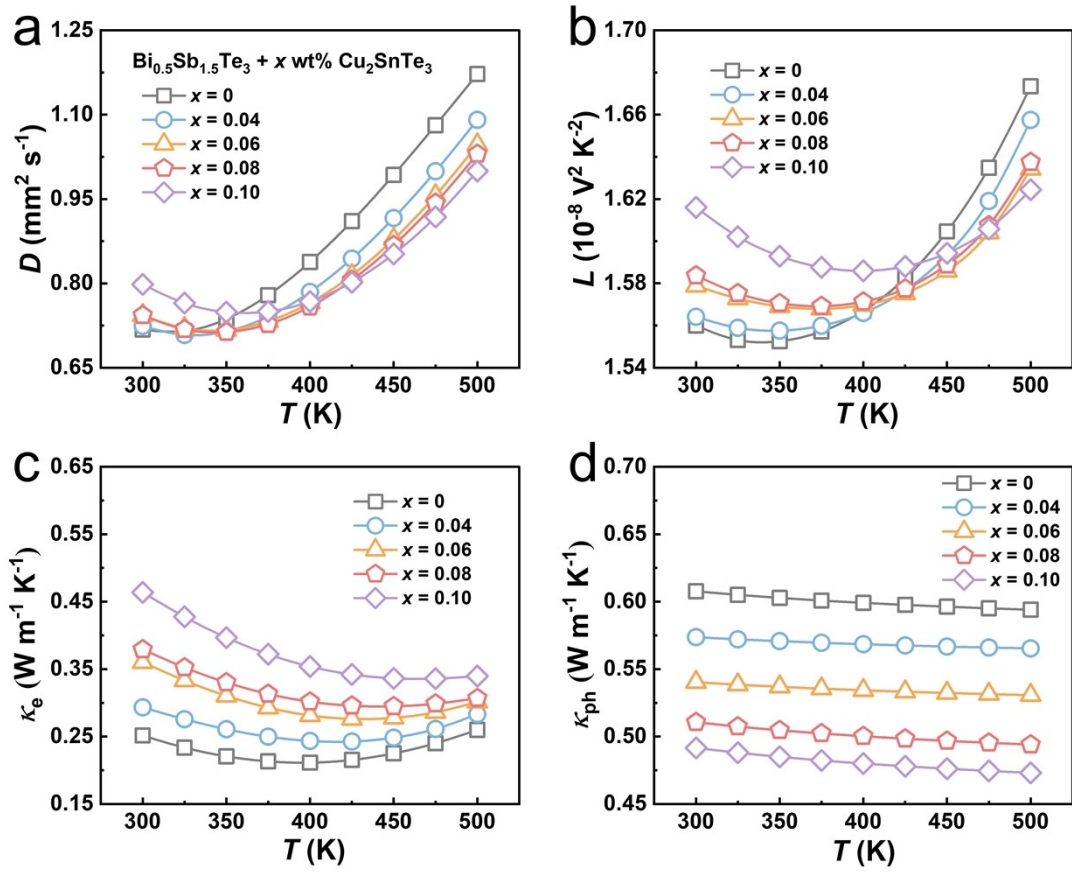

**Figure S4.** Temperature dependence of (a) thermal diffusivity  $D$ , (b) Lorentz factor  $L$ , (c) electronic thermal conductivity  $\kappa_e$ , and (d) lattice thermal conductivity  $\kappa_{\text{ph}}$  of  $\text{Bi}_{0.5}\text{Sb}_{1.5}\text{Te}_3 + x \text{ wt}\% \text{ Cu}_2\text{SnTe}_3$  series samples.

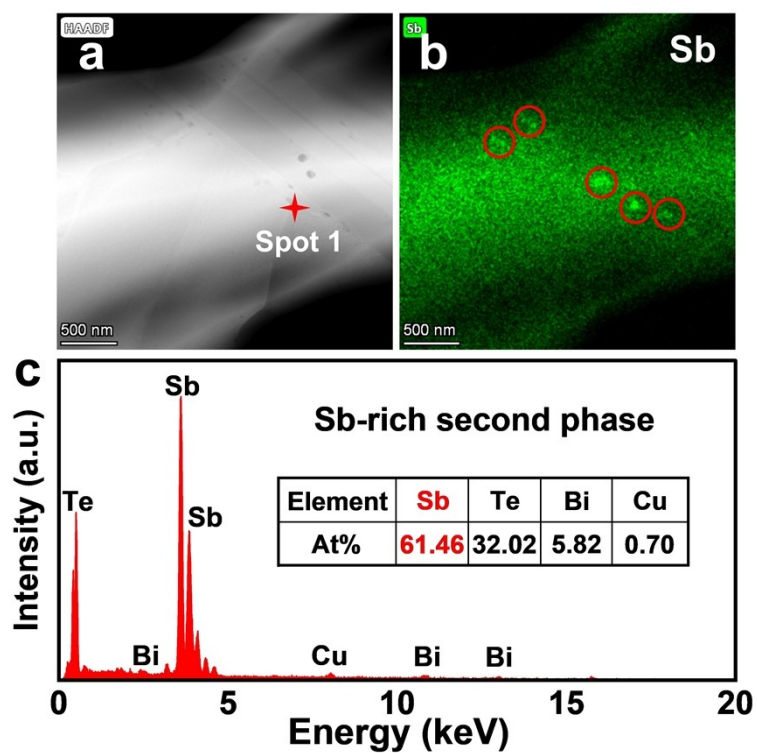

**Figure S5.** (a) HAADF image and (b) the corresponding EDS elemental mapping of Sb-enriched area. (c) Actual atomic fraction of “Spot 1” in (a).

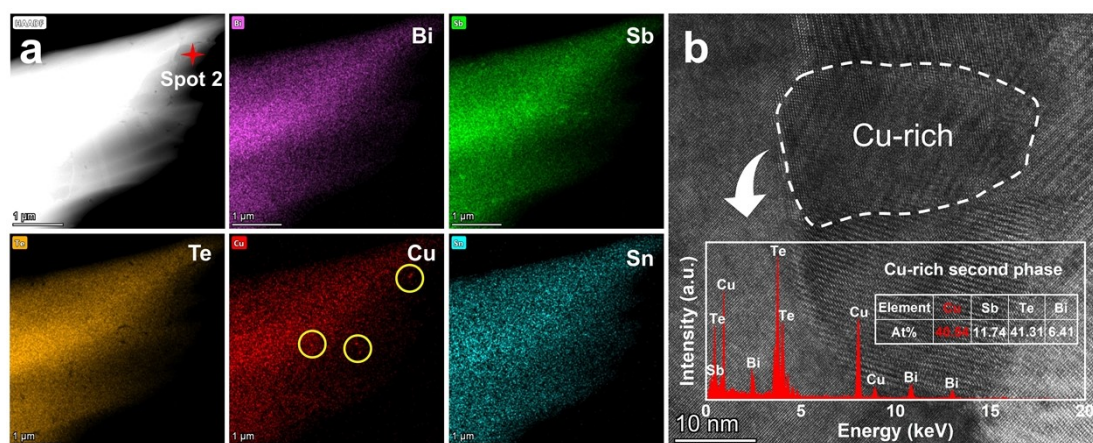

**Figure S6.** (a) HAADF image and the corresponding EDS elemental mappings of Cu-enriched area. (b) High-resolution TEM image and corresponding actual atomic fraction of “Spot 2” in (a) indicate the existence of Cu-enriched area.



## Debye-Callaway model

The Debye-Callaway model, which visualizes the contribution of multi-scale defects to phonon scattering, can explain the mechanism for the reduced lattice thermal conductivity of  $\text{Bi}_{0.5}\text{Sb}_{1.5}\text{Te}_3 + x \text{ wt}\% \text{ Cu}_2\text{SnTe}_3$  samples. Here the equation for  $\kappa_{\text{ph}}$  is as follows:

$$\kappa_{ph} = \frac{k_B}{2\pi^2\nu} \left( \frac{k_B T}{\hbar} \right)^3 \int_0^{\theta_D/T} \tau_{\text{tot}}(x) \frac{x^4 e^x}{(e^x - 1)^2} dx$$

The integral term along with the coefficients in the equation is the spectral lattice thermal conductivity  $\kappa_s$ , namely:

$$\kappa_s = \frac{k_B}{2\pi^2\nu} \left( \frac{k_B T}{\hbar} \right)^3 \frac{x^4 e^x}{\tau_{\text{tot}}^{-1}(x)(e^x - 1)^2}$$

where  $x = \hbar\omega/k_B T$  is the reduced phonon frequency,  $\hbar$  is the reduced Plank constant,  $\omega$  is the phonon frequency,  $k_B$  is the Boltzmann constant,  $T$  is the absolute temperature,  $\nu$  is the in-plane average velocity of phonon,  $\theta_D$  is the Debye temperature.  $\tau_{\text{tot}}$  is the frequency-dependent total relaxation time, which can be obtained according to Matthiessen's rule:

$$\tau_{\text{tot}}^{-1} = \tau_U^{-1} + \tau_{PD}^{-1} + \tau_{GB}^{-1} + \tau_D^{-1} + \tau_{SP}^{-1}$$

For thermoelectric materials, phonon scattering sources with different specific frequencies mainly include Umklapp scattering (U), point defects scattering (PD), grain boundaries scattering (GB), dislocations scattering (D), and second phases scattering (SP).

The relaxation time associated with Umklapp phonon-phonon scattering ( $\tau_U$ ) can be calculated by the following equation:

$$\tau_U^{-1} = A_N \frac{2}{(6\pi^2)^{1/3}} \frac{k_B V^{1/3} \gamma^2 \omega^2 T}{M \nu^3}$$

where  $V$ ,  $\gamma$ , and  $M$  represent atomic volume, Gruneisen parameter, and atomic mass, respectively.  $A_N$  can be determined by fitting experimental data of crystalline materials in the literature.

The relaxation time associated with point defects scattering ( $\tau_{PD}$ ) is calculated from:

$$\tau_{PD}^{-1} = \frac{V\omega^4}{4\pi\nu^3}\Gamma$$

where  $\Gamma$  is the point defects scattering parameter expressed as:

$$\Gamma = x(1-x) \left[ \left( \frac{\Delta M}{M} \right)^2 + \frac{2}{9} \left( G + 6.4\gamma \right) \frac{1+r}{1-r} \right]^2 \left( \frac{\Delta a}{a} \right)^2$$

where  $x$ ,  $G$ ,  $r$ ,  $\Delta M$  and  $\Delta a$  are the fractional concentration of either of constituents, the parameter representing the ratio of fractional change of bulk modulus to that of local bond length, Poisson's ratio, the difference in mass, and the difference in lattice constants, respectively.

The relaxation time associated with grain boundaries scattering ( $\tau_{GB}$ ) is related to the average grain size  $d$ , the relevant formula is as follows:

$$\tau_{GB}^{-1} = \frac{\nu}{d}$$

The relaxation time associated with dislocations scattering ( $\tau_D$ ) includes dislocation core scattering relaxation time ( $\tau_{DC}$ ) and dislocation strain scattering relaxation time. The formulas are as follows:

$$\tau_{DC}^{-1} = N_D \frac{V^{\frac{4}{3}}}{\nu^2} \omega^3$$

$$\tau_{DS}^{-1} = 0.6B_D^2 N_D (\gamma + \Delta\gamma)^2 \omega \left\{ \frac{1}{2} + \frac{1}{24} \left( \frac{1-2r}{1-r} \right)^2 \left[ 1 + \sqrt{2} \left( \frac{\nu_L}{\nu_T} \right) \right]^2 \right\}$$

$$\Delta\gamma = \frac{V_{ST} C_0 K}{k_B T_a} (\gamma\alpha^2 - \alpha\beta)$$

$$\alpha = \frac{V_{BT} - V_{ST}}{V_{ST}}$$

$$\beta = \frac{M_{ST} - M_{BT}}{2M_{ST}}$$

where  $N_D$ ,  $B_D$ ,  $\Delta\gamma$ ,  $v_L$ ,  $v_T$ ,  $C_0$ ,  $K$ ,  $T_a$  are dislocation density, effective Burger's vector, change in Grüneisen parameter, longitudinal phonon velocity, transverse phonon velocity, concentration of  $\text{Bi}_2\text{Te}_3$  in  $\text{Bi}_{0.5}\text{Sb}_{1.5}\text{Te}_3$ , bulk modulus of  $\text{Sb}_2\text{Te}_3$ , and sample sintering temperature, respectively. In the above equation, BT and ST are abbreviations for  $\text{Bi}_2\text{Te}_3$  and  $\text{Sb}_2\text{Te}_3$ .

The relaxation time associated with second phases scattering ( $\tau_{SP}$ ) is calculated from:

$$\tau_{SP}^{-1} = v \left[ (2\pi R^2)^{-1} + \left( \frac{4}{9} \pi R^2 (\Delta D/D)^2 (\omega R/v)^4 \right)^{-1} \right]^{-1} N_p$$

where  $D$ ,  $\Delta D$ ,  $R$ , and  $N_p$  are the mass density of the matrix, the density difference between the matrix and the nanoscale second phase precipitates, the average radius of the second phases, and the number density of the second phases.

**Table S4.** Specific parameters for calculating the lattice thermal conductivity of the  $\text{Bi}_{0.5}\text{Sb}_{1.5}\text{Te}_3 + 0.08 \text{ wt}\% \text{ Cu}_2\text{SnTe}_3$  sample in the Debye-Callaway model.

| Parameters | Description                                     | Values                             | Methods |
|------------|-------------------------------------------------|------------------------------------|---------|
| $\theta_D$ | Debye temperature                               | 94 K                               | [10]    |
| $d$        | Grain size                                      | $2 \times 10^{-6} \text{ m}$       | Exp.    |
| $A_N$      | Prefactor of Umklapp scattering relaxation time | 2.6                                | [11]    |
| $M_{BT}$   | Atomic mass of $\text{Bi}_2\text{Te}_3$         | $2.79 \times 10^{-25} \text{ kg}$  | -       |
| $M_{ST}$   | Atomic mass of $\text{Sb}_2\text{Te}_3$         | $2.07 \times 10^{-25} \text{ kg}$  | -       |
| $V_{BT}$   | Atomic volume of $\text{Bi}_2\text{Te}_3$       | $3.40 \times 10^{-29} \text{ m}^3$ | -       |
| $V_{ST}$   | Atomic volume of $\text{Sb}_2\text{Te}_3$       | $3.31 \times 10^{-29} \text{ m}^3$ | -       |

|          |                                                                                             |                                       |        |
|----------|---------------------------------------------------------------------------------------------|---------------------------------------|--------|
| $V$      | Average atomic volume of<br>$\text{Bi}_{0.5}\text{Sb}_{1.5}\text{Te}_3$                     | $31.26 \text{ \AA}^3$                 | [12]   |
| $N_d$    | Dislocation density                                                                         | $4.17 \times 10^{10} \text{ cm}^{-2}$ | Exp.   |
| $B_D$    | Effective Burger's vector                                                                   | $1.2 \times 10^{-9} \text{ m}$        | Fitted |
| $\gamma$ | Grüneisen parameter                                                                         | 2.33                                  | [13]   |
| $v$      | In-plane average velocity of phonon                                                         | $2147 \text{ m s}^{-1}$               | [13]   |
| $v_L$    | Longitudinal phonon velocity                                                                | $2884 \text{ m s}^{-1}$               | [14]   |
| $v_T$    | Transverse phonon velocity                                                                  | $1780 \text{ m s}^{-1}$               | [13]   |
| $r$      | Poisson's ratio                                                                             | 0.24                                  | [12]   |
| $N_p$    | Number density of second phases                                                             | $7.33 \times 10^{21} \text{ m}^{-3}$  | Exp.   |
| $R$      | Average radius of second phases                                                             | 20 nm                                 | Exp.   |
| $D$      | Density of matrix                                                                           | $6.65 \text{ g cm}^{-3}$              | Exp.   |
| $C_0$    | Concentration of $\text{Bi}_2\text{Te}_3$ in<br>$\text{Bi}_{0.5}\text{Sb}_{1.5}\text{Te}_3$ | 0.25                                  | -      |
| $K$      | Bulk modulus                                                                                | 44.8 GPa                              | [13]   |
| $T_a$    | Sample Sintering temperature                                                                | 693 K                                 | Exp.   |

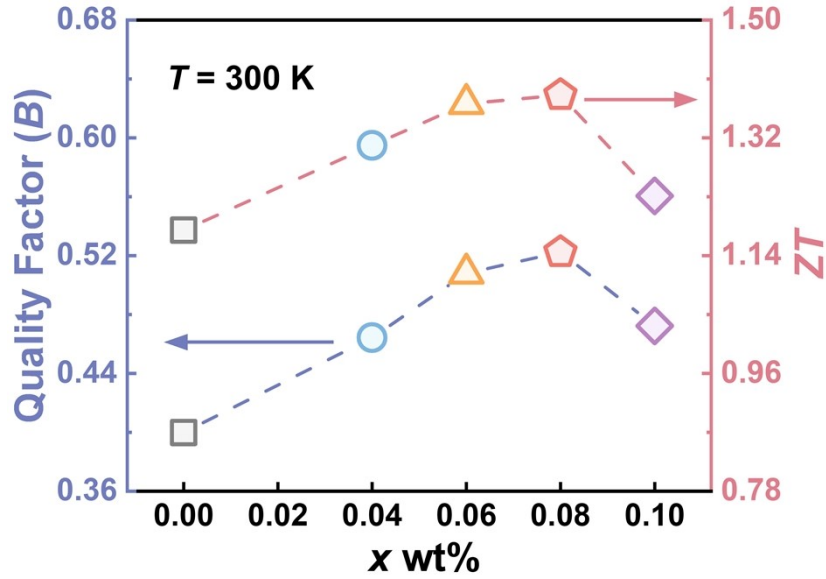

**Figure S7.** Variation of thermoelectric quality factor ( $B$ ) and figure of merit  $ZT$  with  $\text{Cu}_2\text{SnTe}_3$  content at 300 K. The similar variation trend of the two curves indicates that higher  $B$  is obtained by doping appropriate amount of  $\text{Cu}_2\text{SnTe}_3$ , thus increasing  $ZT$  value.

### The calculation of average $ZT$ and engineering $ZT$

The average  $ZT$  ( $ZT_{\text{ave}}$ ) is an important parameter for evaluating the thermoelectric properties of materials within a certain temperature range, which can be calculated by the following formula:<sup>[15]</sup>

$$ZT_{\text{ave}} = \frac{1}{T_h - T_c} \int_{T_c}^{T_h} ZT(T) dT$$

where  $T_h$  and  $T_c$  are the temperatures of the hot side and the cold side, respectively.

The engineering  $ZT$  ( $ZT_{\text{eng}}$ ) provides a practical method for evaluating the maximum thermoelectric conversion efficiency ( $\eta_{\text{max}}$ ). The calculation formula of  $ZT_{\text{eng}}$  is as follows:<sup>[16]</sup>

$$(ZT)_{eng} = Z_{eng}\Delta T = \frac{\left(\int_{T_c}^{T_h} S(T)dT\right)^2}{\int_{T_c}^{T_h} \rho(T)dT \int_{T_c}^{T_h} \kappa(T)dT} \Delta T = \frac{(PF)_{eng}}{\int_{T_c}^{T_h} \kappa(T)dT} \Delta T$$

where  $S(T)$ ,  $\rho(T)$ ,  $\kappa(T)$  are Seebeck coefficient, electrical resistivity and total thermal conductivity, all of which are temperature dependent.

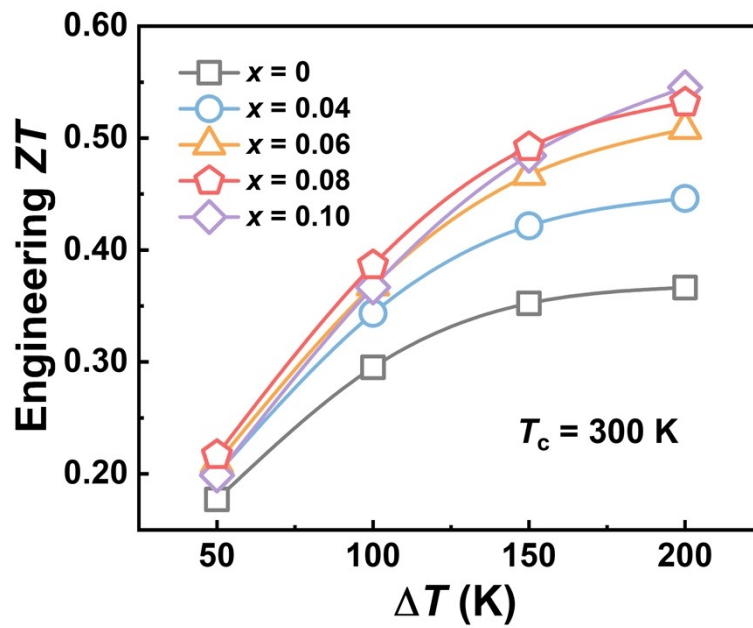

**Figure S8.** Calculated engineering  $ZT$  at the cold-side temperature ( $T_c$ ) of 300 K.

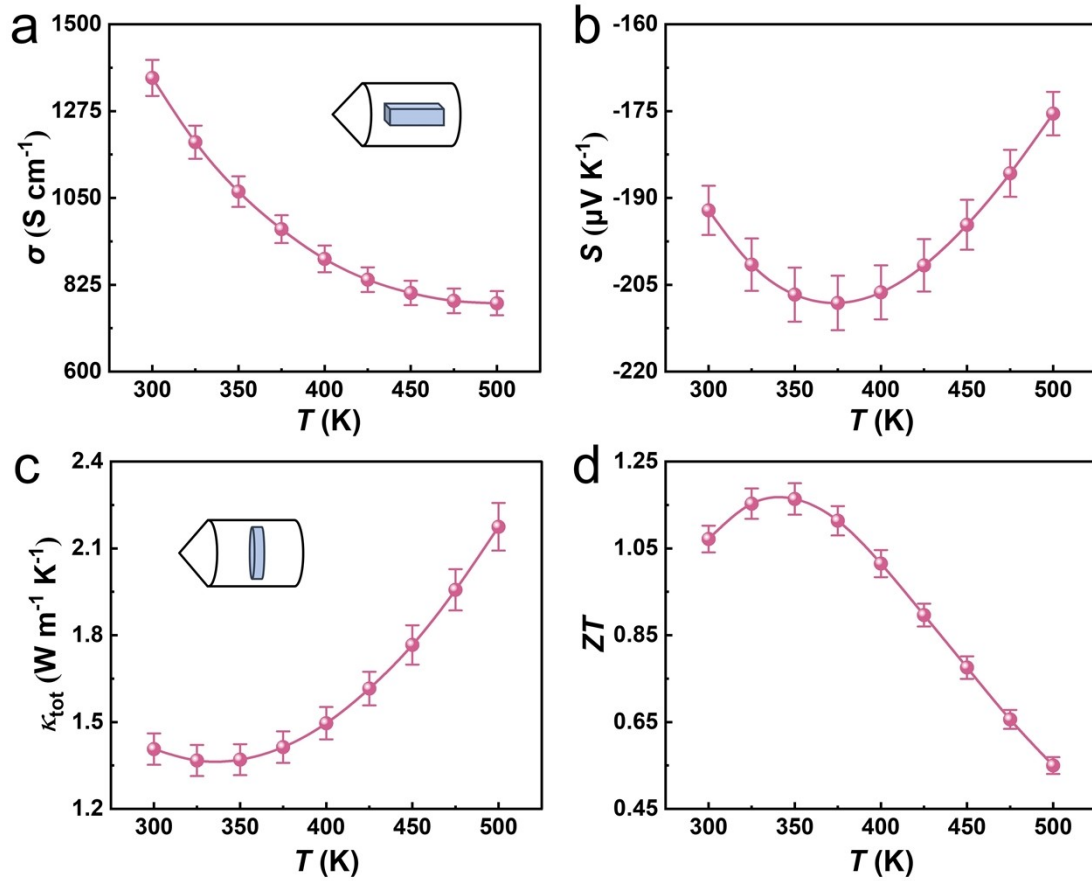

**Figure S9.** Temperature dependence of (a) electrical conductivity, (b) Seebeck coefficient, (c) total thermal conductivity, and (d)  $ZT$  value for previously reported zone-melted  $\text{Bi}_2\text{Te}_{2.7}\text{Se}_{0.3}$  materials used to assemble the thermoelectric module. The orientation of the test samples in the ingot is shown in figures (a) and (c).

### Multi-physics field simulations

Multi-physics simulations were performed using the COMSOL program and its dedicated “thermoelectric effect” module to analyze the output performance. Seventeen sets of thermoelectric module, comprising TE legs, Cu electrodes, insulating ceramic substrates, and loads, were modeled in three dimensions. The temperature-dependent parameters ( $S$ ,  $\sigma$ , and  $\kappa_{\text{tot}}$ ) for both our  $p$ -type  $\text{Bi}_{0.5}\text{Sb}_{1.5}\text{Te}_3 + 0.08 \text{ wt\% Cu}_2\text{SnTe}_3$  and zone-melted  $n$ -type counterparts were integrated as input. Theoretical conversion efficiency (depicted in Figure 6b) and output power (illustrated in Figure S10) were simulated by adjusting the cross-sectional area ratio of  $p$ - and  $n$ -type legs, along with the ratio of leg height to total section area.

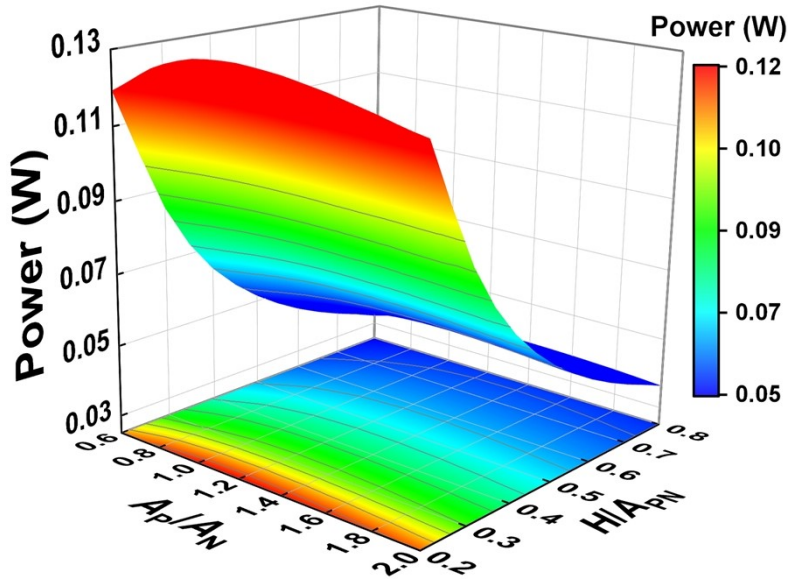

**Figure S10.** Multi-physics field simulated output power as a function of the cross-sectional area ratio of  $p$ - and  $n$ -type legs and the ratio of leg height versus total section area.

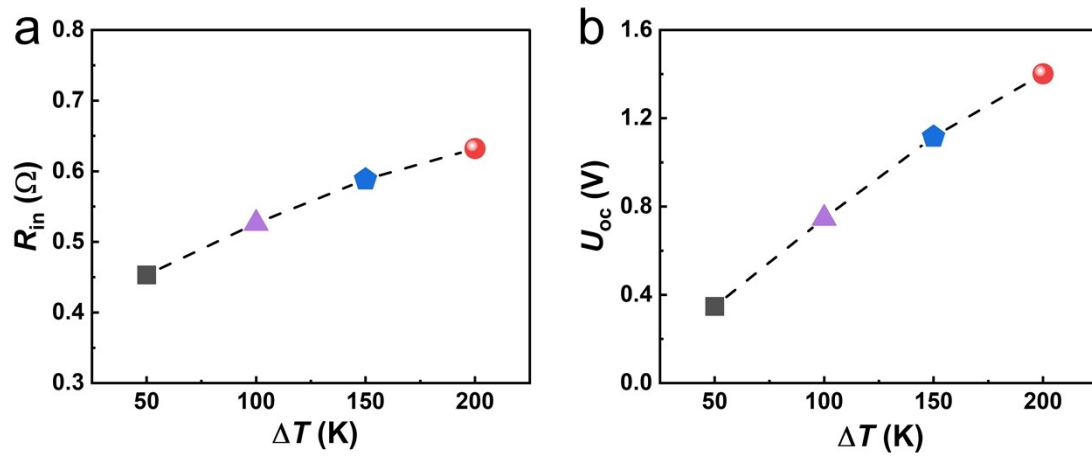

**Figure S11.** (a) Internal resistance  $R_{in}$  and (b) open-circuit voltage  $U_{oc}$  change with temperature difference  $\Delta T$ .



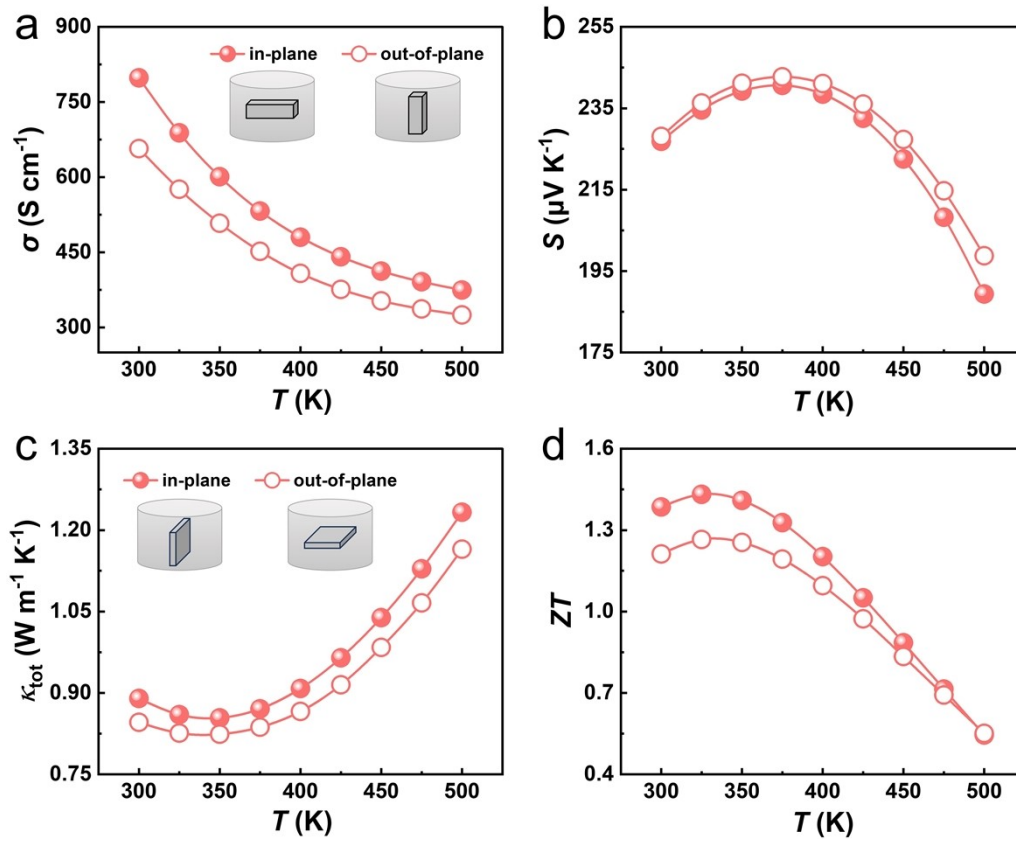

**Figure S12.** Comparison of electronic and thermal transport properties of the representative  $\text{Bi}_{0.5}\text{Sb}_{1.5}\text{Te}_3 + 0.08 \text{ wt}\% \text{ Cu}_2\text{SnTe}_3$  sample along both the in-plane and out-of-plane directions, including (a) electrical conductivity, (b) Seebeck coefficient, (c) total thermal conductivity, and (d)  $ZT$  value.

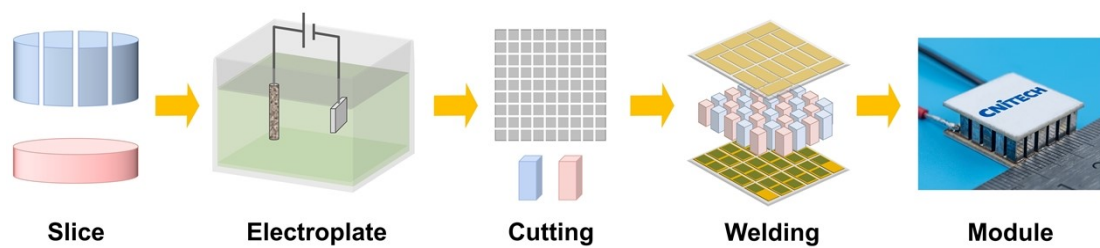

**Figure S13.** Schematic diagram of the process for manufacturing materials into a TE module.

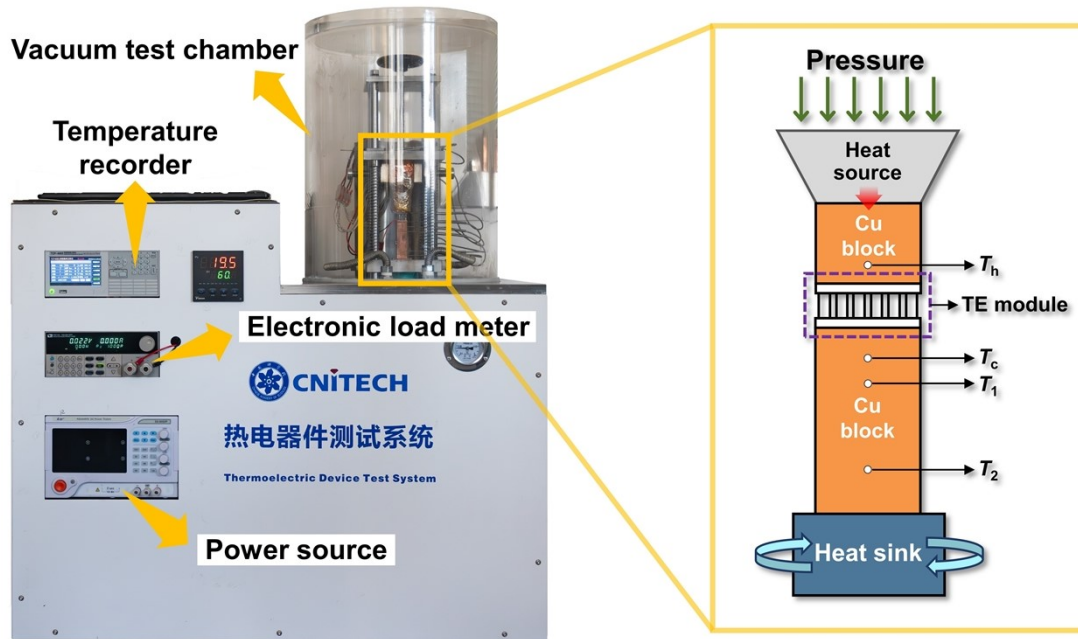

**Figure S14.** The test system for measuring the conversion efficiency and output power of thermoelectric modules.

### Synthesis of $\text{Cu}_2\text{SnTe}_3$ compound

High-purity Cu (copper wires, 99.99 %), Sn (granules, 99.999 %) and Te (chunks, 99.999 %) were weighed and mixed according to the stoichiometric ratio of  $\text{Cu}_2\text{SnTe}_3$ . Then the vacuum-sealed quartz tube containing the feedstock elements was placed in the pit furnace heated at 1273 K for 300 min, continued heating at 923 K for 300 min, and slowly cooled to room temperature. Subsequently, the obtained ingot was ball milled for 30 min using a high-speed vibrating ball mill (MSK-SFM-3, China) under the protection of argon gas. Finally, the  $\text{Cu}_2\text{SnTe}_3$  compound powder was sieved through a 300-mesh screen (approximately 50  $\mu\text{m}$ ) and stored in argon atmosphere.

## References

- [1] M. Venkatraman, A. Schlieper, R. Blachnik and B. Gather, *Int. J. Mater. Res.*, 1994, **85**, 354–359.
- [2] F. K. Lotgering, *J. Inorg. Nucl. Chem.*, 1959, **9**, 113–123.
- [3] J. Zhu, X. Zhang, M. Guo, J. Li, J. Hu, S. Cai, W. Cai, Y. Zhang and J. Sui, *Npj Comput. Mater.*, 2021, **7**, 116.
- [4] J. Shen, Z. Chen, S. Lin, L. Zheng, W. Li and Y. Pei, *J. Mater. Chem. C*, 2016, **4**, 209–214.
- [5] Q. Shi, X. Zhao, Y. Chen, L. Lin, D. Ren, B. Liu, C. Zhou and R. Ang, *ACS Appl. Mater. Interfaces*, 2022, **14**, 45582–45589.
- [6] G. Wu, Z. Yan, X. Wang, X. Tan, K. Song, L. Chen, Z. Guo, G.-Q. Liu, Q. Zhang, H. Hu and Jun Jiang, *ACS Appl. Mater. Interfaces*, 2021, **13**, 57514–57520.
- [7] K. Pang, M. Yuan, Q. Zhang, Y. Li, Y. Zhang, W. Zhou, G. Wu, X. Tan, J. G. Noudem, C. Cui, H. Hu, J. Wu, P. Sun, G.-Q. Liu and J. Jiang, *Small*, 2023, 2306701.
- [8] X. Wang, J. Cheng, L. Yin, Z. Zhang, X. Wang, J. Sui, X. Liu, J. Mao, F. Cao and Q. Zhang, *Adv. Funct. Mater.*, 2022, **32**, 2200307.
- [9] F. Hao, P. Qiu, Y. Tang, S. Bai, T. Xing, H.-S. Chu, Q. Zhang, P. Lu, T. Zhang, D. Ren, J. Chen, X. Shi and L. Chen, *Energy Environ. Sci.*, 2016, **9**, 3120–3127.
- [10] D. Bessas, I. Sergueev, H.-C. Wille, J. Perßon, D. Ebling and R. P. Hermann, *Phys. Rev. B*, 2012, **86**, 224301.
- [11] Y. Yu, D.-S. He, S. Zhang, O. Cojocaru-Mirédin, T. Schwarz, A. Stoffers, X.-Y. Wang, S. Zheng, B. Zhu, C. Scheu, D. Wu, J.-Q. He, M. Wuttig, Z.-Y. Huang and F.-Q. Zu, *Nano Energy*, 2017, **37**, 203–213.
- [12] E. S. Toberer, A. Zevalkink and G. J. Snyder, *J. Mater. Chem.*, 2011, **21**, 15843.
- [13] X. Chen, H. D. Zhou, A. Kiswandhi, I. Miotkowski, Y. P. Chen, P. A. Sharma, A. L. Lima Sharma, M. A. Hekmaty, D. Smirnov and Z. Jiang, *Appl. Phys. Lett.*, 2011, **99**, 261912.
- [14] F. Yang, T. Ikeda, G. J. Snyder and C. Dames, *J. Appl. Phys.*, 2010, **108**, 034310.
- [15] X. Zhang and L.-D. Zhao, *J. Materiomics*, 2015, **1**, 92–105.

[16] H. S. Kim, W. Liu, G. Chen, C.-W. Chu and Z. Ren, *Proc. Natl. Acad. Sci. U.S.A.*, 2015, **112**, 8205–8210.
